# Supplementary material for: Association of Fine Particulate Matter and Risk of Stroke in Patients With Atrial Fibrillation
Source: PubMed Central journal article supplement (PMC7492916; doi:10.1001/jamanetworkopen.2020.11760), 2020-09-15
Supplement: jamanetwopen-e2011760-s001.pdf [file jamanetwopen-e2011760-s001.pdf]

## Supplementary Online Content

Rhinehart ZJ, Kinnee E, Essien UR, et al. Association of fine particulate matter and risk of stroke in patients with atrial fibrillation. *JAMA Netw Open*. 2020;3(9):e2011760.  
doi:10.1001/jamanetworkopen.2020.11760

**eTable 1.** International Classification of Diseases Ninth Revision (ICD-9) Code-Based Definitions

**eTable 2.** Incidence of Ischemic Stroke per 1000 Person-years by Residential Estimates of PM<sub>2.5</sub> Quartile, Total Cohort and Stratified by Age (<75, ≥75 Years at Study Entry) and Sex

**eFigure 1.** Flow Diagram Describing Participant Selection and Stepwise Exclusion From the Analysis

**eFigure 2.** Ischemic Stroke Events Over Time by PM<sub>2.5</sub> Quartile Stratified by Age <75 (A) and Age ≥75 Years (B)

**eFigure 3.** Ischemic Stroke Events Over Time by PM<sub>2.5</sub> Quartile Stratified by Sex

**This supplementary material has been provided by the authors to give readers additional information about their work.**

| <b>eTable 1. International Classification of Diseases Ninth Revision (ICD-9) Code-Based Definitions</b>        |                                                                                                                                                                                                                                                                                                                                                                                                           |
|----------------------------------------------------------------------------------------------------------------|-----------------------------------------------------------------------------------------------------------------------------------------------------------------------------------------------------------------------------------------------------------------------------------------------------------------------------------------------------------------------------------------------------------|
| <b>Medical Comorbidity</b>                                                                                     | <b>ICD-9 Codes</b>                                                                                                                                                                                                                                                                                                                                                                                        |
| Hemorrhagic stroke (hospitalization with any of the following as 1 <sup>st</sup> diagnosis)                    | 430, 431, 432, 432.1, 432.9                                                                                                                                                                                                                                                                                                                                                                               |
| Ischemic or other stroke (hospitalization with any of the following as 1 <sup>st</sup> diagnosis)              | 433.01, 433.11, 433.21, 433.31, 433.81, 433.91, 434.01, 434.11, 434.91, 436                                                                                                                                                                                                                                                                                                                               |
| TIA or amaurosis fugax (hospitalization with any of the following as 1 <sup>st</sup> diagnosis)                | 435.0, 435.1, 435.2, 435.3, 435.8, 435.9, 362.34                                                                                                                                                                                                                                                                                                                                                          |
| Myocardial infarction hospitalization (hospitalization with any of the following as 1 <sup>st</sup> diagnosis) | 410.00, 410.01, 410.02, 410.10, 410.11, 410.12, 410.20, 410.21, 410.22, 410.30, 410.31, 410.32, 410.40, 410.41, 410.41, 410.42, 410.50, 410.51, 410.52, 410.60, 410.61, 410.62, 410.70, 410.71, 410.72, 410.80, 410.81, 410.82, 410.90, 410.91, 410.92                                                                                                                                                    |
| Heart failure hospitalization (hospitalization with any of the following as primary diagnosis)                 | 402.01; 402.11; 402.91; 404.01; 404.03; 404.11; 404.13; 404.91; 404.93, 428, 428.0, 428.1, 428.2, 428.20, 428.21, 428.22, 428.23, 428.3, 428.30, 428.31, 428.32, 428.33, 428.4, 428.40, 428.41, 428.42, 428.43, 428.9                                                                                                                                                                                     |
| Hypertension                                                                                                   | 401, 401.0, 401.1, 401.9, 402, 402.0, 402.00, 402.01, 402.1, 402.10, 402.11, 402.9, 402.90, 402.91, 403, 403.0, 403.00, 403.01, 403.1, 403.10, 403.11, 403.9, 403.90, 403.91, 404, 404.0, 404.00, 404.01, 404.02, 404.03, 404.1, 404.10, 404.11, 404.12, 404.13, 404.9, 404.90, 404.91, 404.92, 404.93, 405, 405.0, 405.01, 405.09, 405.1, 405.11, 405.19, 405.9, 405.91, 405.99, 437.2                   |
| Diabetes                                                                                                       | 250, 250.0, 250.00, 250.01, 250.02, 250.03, 250.1, 250.10, 250.11, 250.12, 250.13, 250.2, 250.20, 250.21, 250.22, 250.23, 250.3, 250.30, 250.31, 250.32, 250.33, 250.4, 250.40, 250.41, 250.42, 250.43, 250.5, 250.50, 250.51, 250.52, 250.53, 250.6, 250.60, 250.61, 250.62, 250.63, 250.7, 250.70, 250.71, 250.72, 250.73, 250.8, 250.80, 250.81, 250.82, 250.83, 250.9, 250.90, 250.91, 250.92, 250.93 |
| Heart failure                                                                                                  | 402.01, 402.11, 402.91, 404.01, 404.03, 404.13, 404.91, 404.93, 428, 428.0, 428.1, 428.2, 428.20, 428.21, 428.22, 428.23, 428.3, 428.30, 428.31, 428.32, 428.33, 428.4, 428.40, 428.41, 428.42, 428.43, 428.9                                                                                                                                                                                             |
| Coronary Artery Disease                                                                                        | 414, 414.0, 414.00, 414.01, 414.02, 414.03, 414.04, 414.05, 414.06, 414.07, 414.2, 414.3, 414.4, 414.8, 414.9                                                                                                                                                                                                                                                                                             |
| Peripheral Vascular Disease                                                                                    | 440.2, 440.20, 440.21, 440.22, 440.23, 440.24, 440.29, 440.4, 443.8, 443.81, 43.89, 443.9                                                                                                                                                                                                                                                                                                                 |
| History of hemorrhagic stroke (prior to date of AF ascertainment)                                              | 430, 431, 432, 432.1, 432.9                                                                                                                                                                                                                                                                                                                                                                               |
| History of ischemic or other stroke (prior to date of AF ascertainment)                                        | 433.01, 433.11, 433.21, 433.31, 433.81, 433.91, 434.01, 434.11, 434.91, 436                                                                                                                                                                                                                                                                                                                               |

|                                                                       |                                                                                                                                                                                                                                                                                                                               |
|-----------------------------------------------------------------------|-------------------------------------------------------------------------------------------------------------------------------------------------------------------------------------------------------------------------------------------------------------------------------------------------------------------------------|
| History of TIA or amaurosis fugax (prior to date of AF ascertainment) | 435.0, 435.1, 435.2, 435.3, 435.8, 435.9, 362.34                                                                                                                                                                                                                                                                              |
| History of coronary artery disease or myocardial infarction           | 410.00, 410.01, 410.02, 410.10, 410.11, 410.12, 410.20, 410.21, 410.22, 410.30, 410.31, 410.32, 410.40, 410.41, 410.41, 410.42, 410.50, 410.51, 410.52, 410.60, 410.61, 410.62, 410.70, 410.71, 410.72, 410.80, 410.81, 410.82, 410.90, 410.91, 410.92, 412, 414.0, 414.2, 414.8, 414.9                                       |
| History of heart failure                                              | 402.01; 402.11; 402.91; 404.01; 404.03; 404.11; 404.13; 404.91; 404.93, 428, 428.0, 428.1, 428.2, 428.20, 428.21, 428.22, 428.23, 428.3, 428.30, 428.31, 428.32, 428.33, 428.4, 428.40, 428.41, 428.42, 428.43, 428.9, 412, 414.00, 414.01, 414.02, 414.03, 414.04, 414.05, 414.06, 414.07, 414.2, 414.3, 414.4, 414.8, 414.9 |

**eTable 2.** Incidence of Ischemic Stroke per 1000 Person-years by Residential Estimates of PM<sub>2.5</sub> Quartile, Total Cohort and Stratified by Age (<75, ≥75 Years at Study Entry) and Sex

|                            | PM <sub>2.5</sub> Quartile |                        |                        |                        |
|----------------------------|----------------------------|------------------------|------------------------|------------------------|
| Incidence*                 | 10.30<br>(9.25-11.49)      | 12.16<br>(10.99-13.46) | 12.51<br>(11.32-13.83) | 15.64<br>(14.28-17.13) |
| Age                        |                            |                        |                        |                        |
| <75                        | 5.18<br>(4.22-6.37)        | 7.79<br>(6.52-9.30)    | 8.02<br>(6.77-9.50)    | 9.94<br>(8.51-11.62)   |
| ≥75                        | 16.50<br>(14.53-18.74)     | 16.71<br>(14.77-18.92) | 17.86<br>(15.78-20.22) | 22.27<br>(19.91-22.92) |
| Sex                        |                            |                        |                        |                        |
| Female                     | 13.45<br>(11.65-15.52)     | 15.11<br>(13.28-17.19) | 14.94<br>(13.14-16.99) | 18.35<br>(16.36-20.60) |
| Male                       | 7.88<br>(6.68-9.29)        | 9.22<br>(7.83-10.87)   | 10.00<br>(8.52-11.73)  | 12.54<br>(10.81-14.56) |
| *Adjusted for age and sex. |                            |                        |                        |                        |

**eFigure 1.** Flow Diagram Describing Participant Selection and Stepwise Exclusion From the Analysis

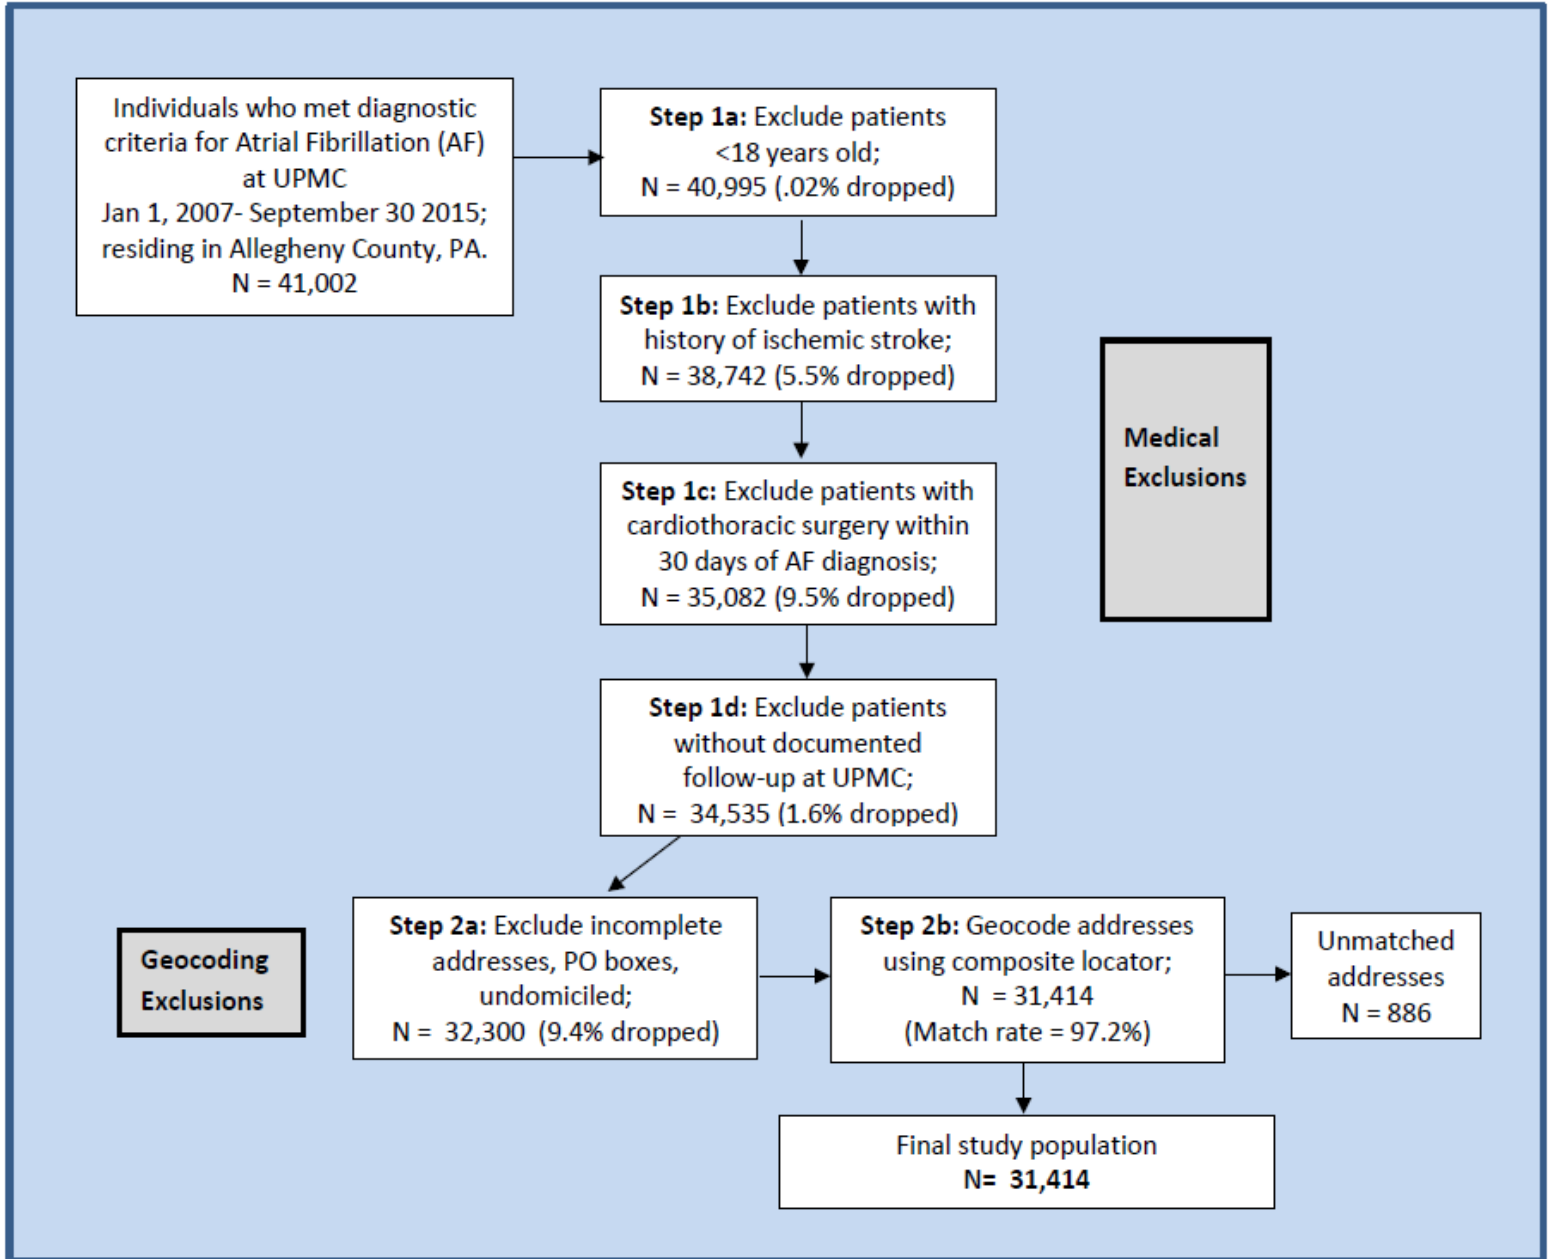

Following exclusions, there were 31,414 individuals included in the final analysis.

**eFigure 2.** Ischemic Stroke Events Over Time by PM<sub>2.5</sub> Quartile Stratified by Age <75 (A) and Age ≥75 Years (B)

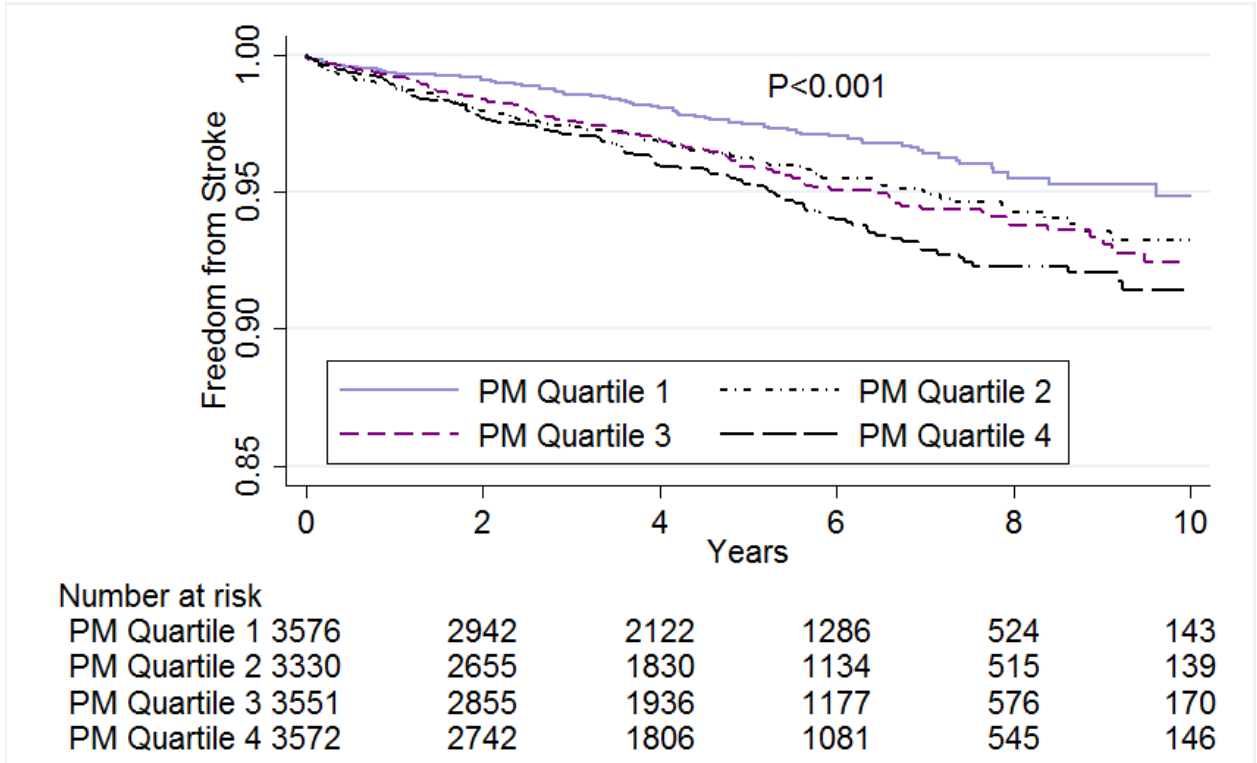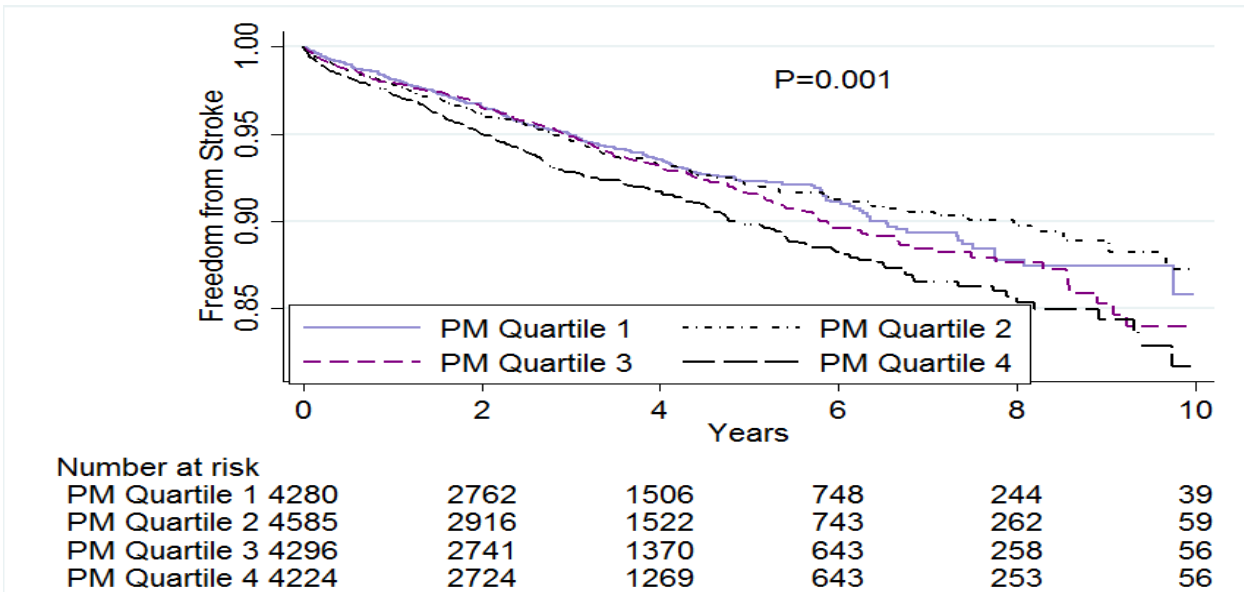

Both age-stratified analyses demonstrate the consistent association of the highest quartile of residential-level PM<sub>2.5</sub> with stroke events.

**eFigure 3.** Ischemic Stroke Events Over Time by PM<sub>2.5</sub> Quartile Stratified by Sex

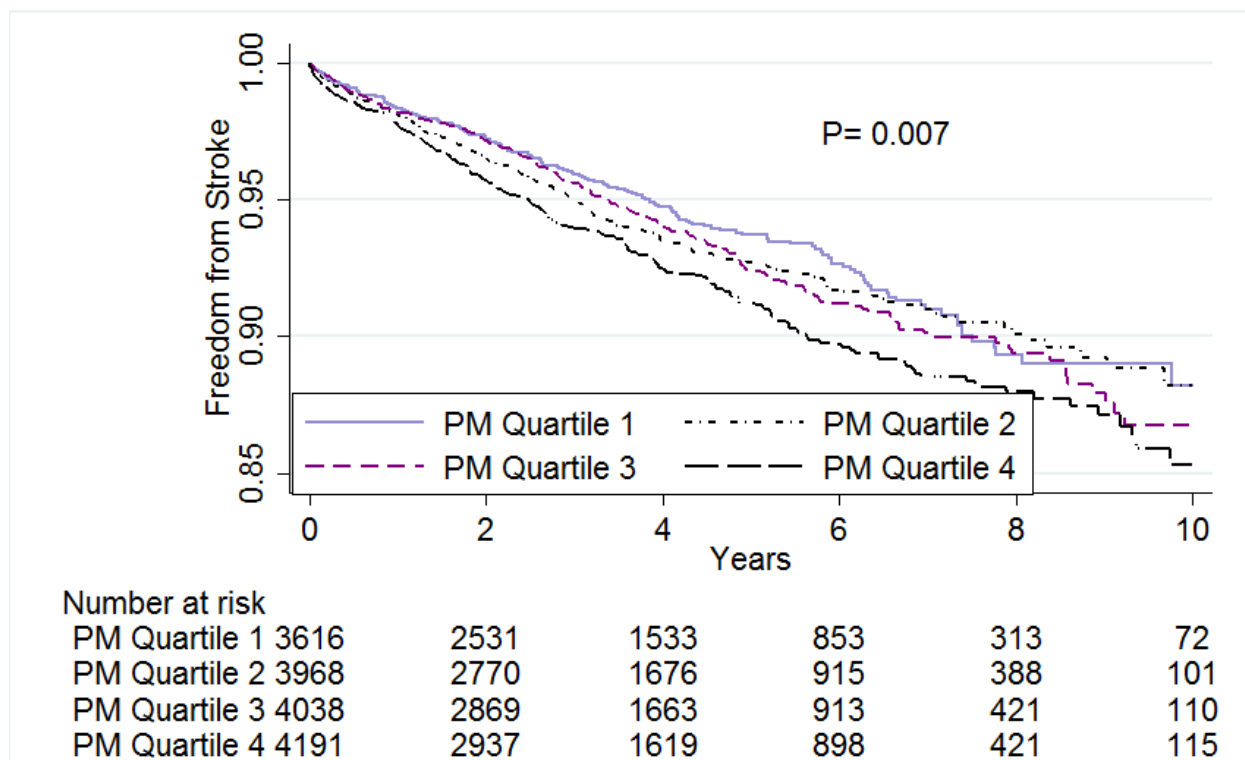

The survival curves by quartile of PM<sub>2.5</sub> in women (A) and men (B). While women in the cohort had greater incidence of strokes than men, the sex-stratified analyses demonstrate the consistent association of the highest quartile of residential-level PM<sub>2.5</sub> with stroke events in both men and women.

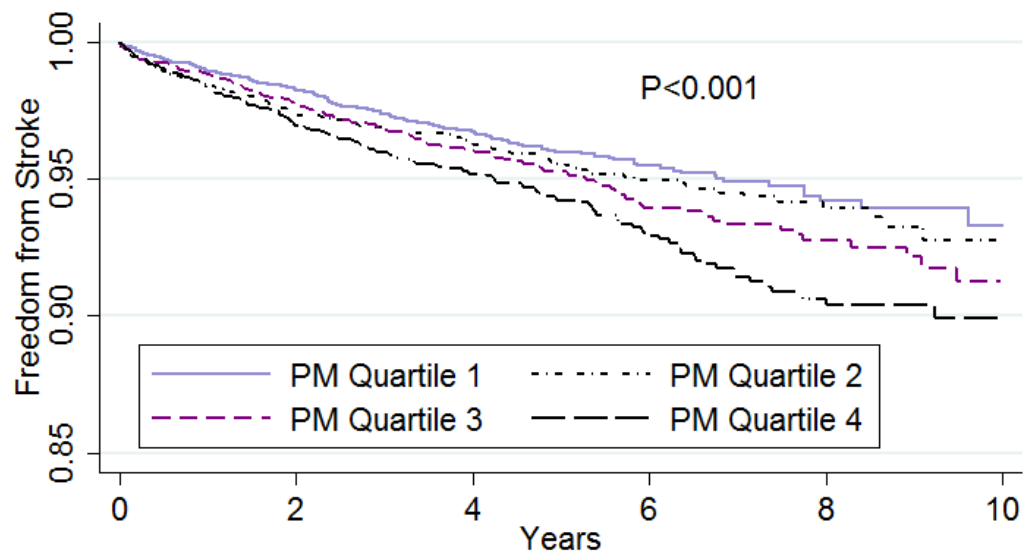

| Number at risk | 0    | 2    | 4    | 6    | 8   | 10  |
|----------------|------|------|------|------|-----|-----|
| PM Quartile 1  | 4240 | 3173 | 2095 | 1181 | 455 | 110 |
| PM Quartile 2  | 3947 | 2801 | 1676 | 962  | 389 | 97  |
| PM Quartile 3  | 3809 | 2727 | 1643 | 907  | 413 | 116 |
| PM Quartile 4  | 3605 | 2529 | 1456 | 826  | 377 | 87  |
